# Supplementary material for: Serological Detection of SARS-CoV-2 Antibodies in Naturally-Infected Mink and Other Experimentally-Infected Animals
Source: MDPI journal article supplement (doi:10.3390/v13081649), 2021-08-19
Supplement: s1 [file s1]

**Table S1.** Correlation (Spearman) between the LIPS-S assay, the LIPS-N assay and the NT according to time of sampling time.

|        |          | <b>Spike vs PRNT</b> |                | <b>Spike vs Nucleo</b> |                | <b>Nucleo vs PRNT</b> |                |
|--------|----------|----------------------|----------------|------------------------|----------------|-----------------------|----------------|
|        | <b>n</b> | <b>r</b>             | <b>p-value</b> | <b>r</b>               | <b>p-value</b> | <b>r</b>              | <b>p-value</b> |
| All    | 77       | 0.7437793            | 9.248e-15      | 0.6831327              | 7.666e-12      | 0.6552078             | 1.011e-10      |
| Day 0  | 30       | 0.7726795            | 5.636e-07      | 0.7543938              | 1.471e-06      | 0.675302              | 4.237e-05      |
| Day 7  | 25       | 0.8661388            | 2.216e-08      | 0.8876923              | 3.284e-09      | 0.8914873             | 2.255e-09      |
| Day 65 | 22       | 0.5056232            | 0.01637        | 0.3111237              | 0.1587         | 0.4911768             | 0.02027        |

Table S1: Correlation (Spearman) between the LIPS-S assay, the LIPS-N assay and the NT according to time of sampling time.
