# Supplementary material for: Serological Detection of SARS-CoV-2 Antibodies in Naturally-Infected Mink and Other Experimentally-Infected Animals
Source: MDPI journal article supplement (doi:10.3390/v13081649), 2021-08-19
Supplement: s1 [file s1]

**Table S2.** Cohen kappa agreement between the LIPS-S assay, the LIPS-N and the NT according to time of sampling time.

|        |                         | Spike vs PRNT |             | Spike vs Nucleo |         | Nucleo vs PRNT |         |
|--------|-------------------------|---------------|-------------|-----------------|---------|----------------|---------|
|        | Number<br>of<br>samples | Kappa         | p-<br>value | κ-value         | p-value | κ-value        | p-value |
| All    | 77                      | 1             | 0           | 0.05647         | 0.3008  | 0.05647        | 0.3008  |
| Day 0  | 30                      | 1             | 0           | 0.4483          | 0.03726 | 0.4483         | 0.03726 |
| Day 7  | 25                      | 1             | 0           | 0.3505          | 0.02912 | 0.3505         | 0.02912 |
| Day 65 | 22                      | 1             | 0           | 0.122           | 0.1551  | 0.122          | 0.1551  |

Table S2: Cohen kappa agreement between the LIPS-S assay, the LIPS-N and the NT according to time of sampling time.
