# Supplementary material for: Serological Detection of SARS-CoV-2 Antibodies in Naturally-Infected Mink and Other Experimentally-Infected Animals
Source: MDPI journal article supplement (doi:10.3390/v13081649), 2021-08-19
Supplement: s1 [file s1]

Figure S1

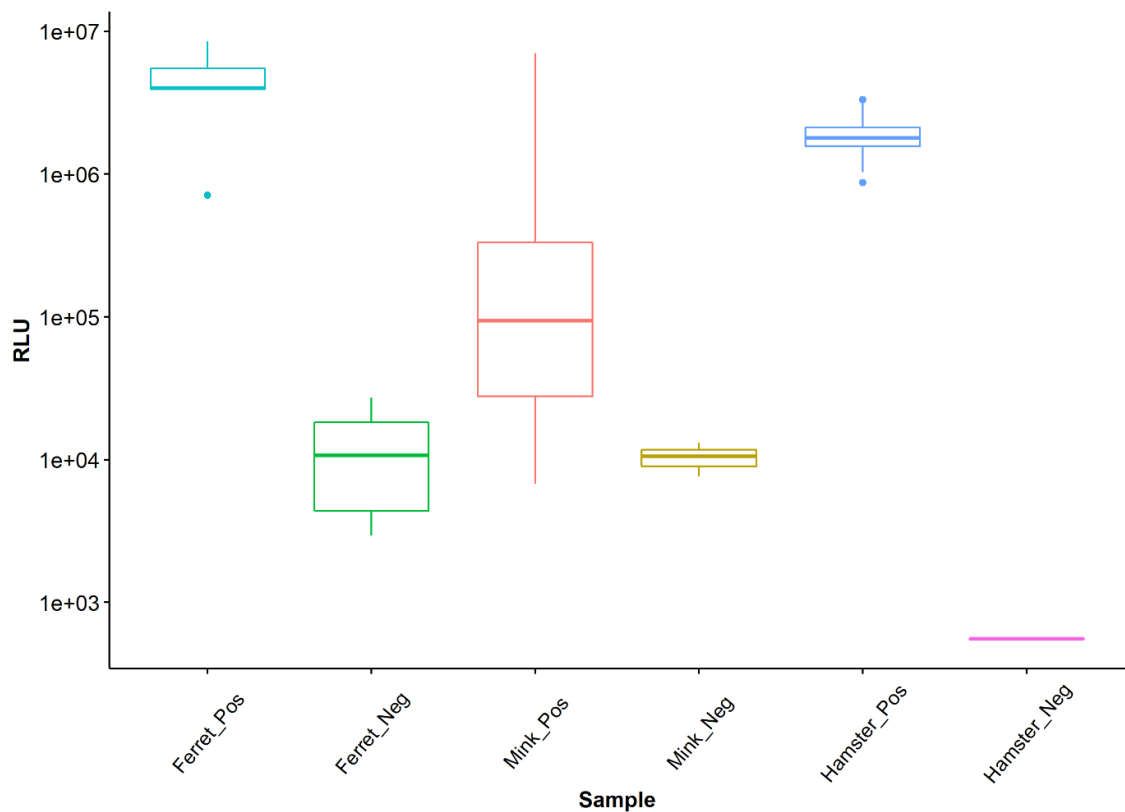

Figure S1: Boxplot showing the differences in antibody levels between the negative and positive samples and the homogeneity of negative samples values across species for the LIPS-N assay.
